# Supplementary material for: LEFTY2 inhibits endometrial receptivity by downregulating Orai1 expression and store-operated Ca2+ entry
Source: PubMed Central journal article supplement (PMC5778154; doi:10.1007/s00109-017-1610-9), 2017-12-11
Supplement: 109_2017_1610_MOESM1_ESM.pdf [file 109_2017_1610_MOESM1_ESM.pdf]

**LEFTY2 Inhibits Endometrial Receptivity by Downregulating Orai1 Expression  
and Store-Operated Ca<sup>2+</sup> Entry**

Madhuri S Salker<sup>1,2</sup>, Yogesh Singh<sup>1</sup>, Ruban RP Durairaj<sup>3</sup>, Jing Yan<sup>1</sup>, Md Alauddin<sup>1,2</sup>,  
Ni Zeng<sup>1</sup>, Jennifer H. Steel<sup>4,5</sup>, Shaqiu Zhang<sup>1</sup>, Jaya Nautiyal<sup>4</sup>, Zoe Webster<sup>5</sup>, Sara Y  
Brucker<sup>2</sup>, Diethelm Wallwiener<sup>2</sup>, B Anne Croy<sup>6</sup>, Jan J Brosens<sup>3,7\*</sup> and Florian Lang<sup>1,8\*</sup>

<sup>1</sup>Department of Physiology I, Eberhard-Karls University Tuebingen, Gmelinstr 5, D- 72076 Tuebingen, Germany.

<sup>2</sup>Department of Women's Health, Eberhard-Karls University Tuebingen, Calwerstr 7, 72076 Tuebingen, Germany.

<sup>3</sup>Division of Biomedical Sciences, Warwick Medical School, CV2 2DX Coventry, UK.

<sup>4</sup>Department of Surgery and Cancer, Institute of Reproductive and Developmental Biology, Faculty of Medicine, Imperial College London, London W12 0NN, UK

<sup>5</sup>ES Cell and Transgenics Facility, Medical Research Council Clinical Sciences Centre, Imperial College London, Du Cane Road, London W12 0NN, UK

<sup>6</sup>Department of Biomedical and Molecular Sciences, Queen's University, Kingston, Ontario, Canada

<sup>7</sup>Tommy's National Centre for Miscarriage Research, University Hospitals Coventry and Warwickshire NHS Trust, Clifford Bridge Rd, Coventry CV2 2DX, UK

<sup>8</sup>Department of Molecular Medicine II, Heinrich Heine University Düsseldorf, Universitätsstrasse 1, Düsseldorf D-40225, Germany

**Correspondence to:**

\*Prof. Dr. Florian Lang

Physiologisches Institut der Universität Tübingen, Gmelinstr. 5, D-72076 Tübingen, Germany; email:

florian.lang@uni-tuebingen.de

\*Prof. Dr. Jan J Brosens

Division of Biomedical Sciences, Warwick Medical School, CV2 2DX Coventry, United Kingdom;

email: J.J.Brosens@warwick.ac.uk

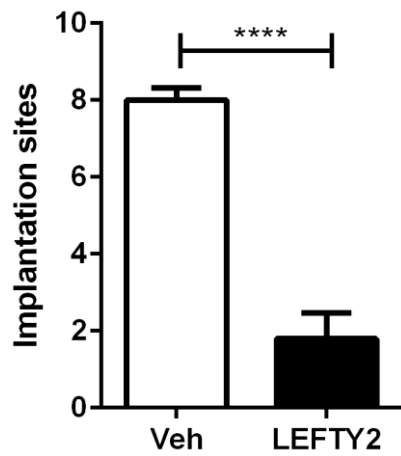

**Supplementary Figure 1: LEFTY2 impairs blastocyst implantation in mice.**

C57BL/6 female mice mated with fertile males were subjected to laparotomy at 3.0 dpc and both uterine horns gently flushed with either vehicle (PBS) or recombinant LEFTY2 (500 ng/ml). Each treatment group consisted of 5 mice. Bar graph shows arithmetic means  $\pm$  SEM ( $n = 5$ ) of the number of implantation sites following uterine flushing with PBS (Veh; White bar) or recombinant LEFTY2 (black bar). \*\*\*\*( $P < 0.0001$ ) indicate significant difference from control mice (Student's  $t$ -test).

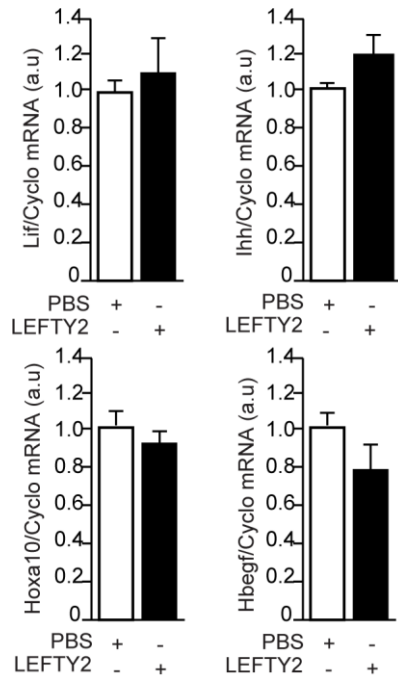

### Supplementary Figure 2: Receptivity genes insensitive to LEFTY2.

Arithmetic means  $\pm$  SEM (n=6) of transcript levels encoding murine *Lif*, *Hbegf*, *Hoxa10* and *Ihh* levels after flushing with PBS (black bars) and with LEFTY2 (500 ng/ml; grey bars). Transcript levels were determined by qRT-PCR, normalized to the levels of *Cyclo* (housekeeping) mRNA and expressed in arbitrary units (a.u.). No significant difference was seen.

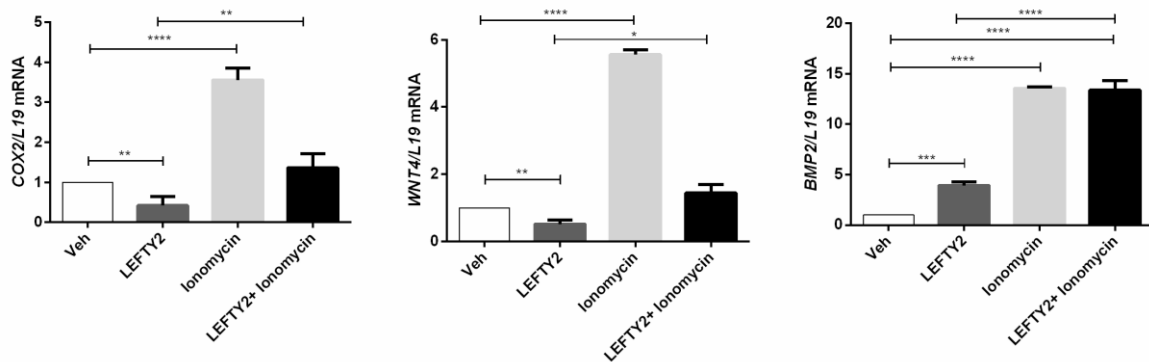

**Supplementary Figure 3: Differential regulation of Ca<sup>2+</sup>-dependent receptivity genes in response to LEFTY2 and Ionomycin.**

Primary HESC cultures were treated with 8-Br-cAMP and MPA for 6 days with or without LEFTY2 (25 ng/ml) or Ionomycin (1  $\mu$ M) or in combination. Transcript levels encoding human *COX2*, *WNT4* and *BMP2* were determined by qRT-PCR and normalized to *L19* (housekeeping) mRNA and expressed in arbitrary units (a.u.). The data shown are arithmetic means  $\pm$  SEM (n=6). \*\*( $P<0.01$ ) and \*\*\*( $P<0.001$ ) indicates significant difference when using Student's *t*-test.

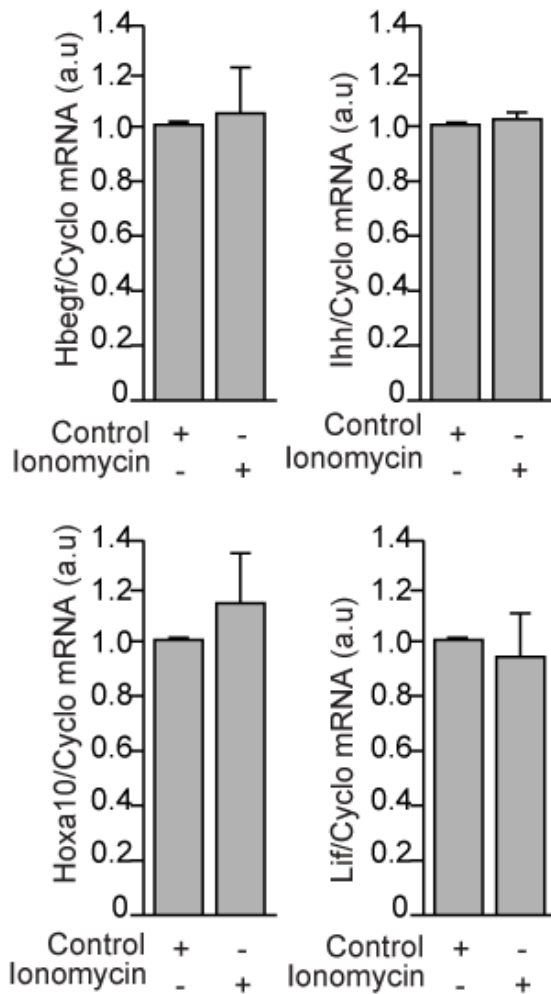

#### Supplementary Figure 4: Receptivity genes insensitive to Ionomycin.

Primary HESC cultures were treated with 8-Br-cAMP and MPA for 6 days with or without Ionomycin (1  $\mu$ M). Arithmetic means  $\pm$  SEM (n=6) of transcript levels encoding human *LIF*, *HBEGF*, *HOXA10*, *IHH* transcript levels determined by qRT-PCR, normalized to the levels of *L19* mRNA and expressed in arbitrary units (a.u.). No significant difference was seen.

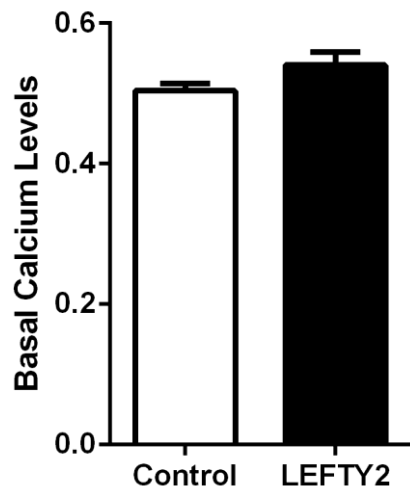

### Supplementary Figure 5: Basal Calcium Levels

Arithmetic means  $\pm$  SEM (n = 6, each experiment 15-30 cells) of basal  $\text{Ca}^{2+}$  of Control (Veh) and LEFTY2 treated cells. No significant difference was seen.
